# Supplementary material
Source: Research Square preprint supplement (doi:10.21203/rs.3.rs-9264188/v1)
Supplement: Supplementary file 1 [file 1dae5a385c3222a57cf18412.xlsx]

## Sheet: シート1-1
samplename(this study)	Acsession	population	origin or breeds/genetic line	Reference
ERR173203	ERR173203	Outgroup	Phacochoerus africanus	Groenen MA et al. (2012)
ERR173211	ERR173211	Outgroup	Sus verrucosus	Groenen MA et al. (2012)
ERR173179	ERR173179	Chinese DP	Jiangquhai	Groenen MA et al. (2012)
ERR173199	ERR173199	Chinese DP	Meishan1	Groenen MA et al. (2012)
ERR173201	ERR173201	Chinese DP	Meishan2	Groenen MA et al. (2012)
ERR173223	ERR173223	Chinese DP	Xiang	Groenen MA et al. (2012)
ERR173224	ERR173224	Chinese DP	Xiang	Groenen MA et al. (2012)
ERR173204	ERR173204	European DP	Pietrain	Groenen MA et al. (2012)
ERR173208	ERR173208	European DP	Pietrain(Eu)	Groenen MA et al. (2012)
ERR977197	ERR977197	European DP	Berkshire	Frantz, et al. (2015)
ERR977199	ERR977199	European DP	Berkshire	Frantz, et al. (2015)
ERR173170	ERR173170	European DP	Duroc	Groenen MA et al. (2012)
ERR173171	ERR173171	European DP	Duroc	Groenen MA et al. (2012)
ERR173174	ERR173174	European DP	Hampshire	Groenen MA et al. (2012)
ERR173175	ERR173175	European DP	Hampshire	Groenen MA et al. (2012)
ERR173180	ERR173180	European DP	Landrace	Groenen MA et al. (2012)
ERR173182	ERR173182	European DP	Landrace	Groenen MA et al. (2012)
ERR173186	ERR173186	European DP	Large_White	Groenen MA et al. (2012)
ERR173192	ERR173192	European DP	Large_White	Groenen MA et al. (2012)
ERR173205	ERR173205	European DP	Pietrain	Groenen MA et al. (2012)
ERR173206	ERR173206	European DP	Pietrain	Groenen MA et al. (2012)
ERR173212	ERR173212	Japanese WB	Japan	Frantz, et al. (2015)
STB-02	CRR1306379 CRR1306380	Southern Chainese WB	Tibetan wild boar(Sichuan)	Du, H., et al. (2024)
STB-06	CRR1306384 CRR1306385	Southern Chainese WB	Tibetan wild boar(Sichuan)	Du, H., et al. (2024)
TPB-12	CRR1306420 CRR1306421	Southern Chainese WB	Tibetan wild boar(Tibet)	Du, H., et al. (2024)
TPB-20	CRR1306429 CRR1306430	Southern Chainese WB	Tibetan wild boar(Tibet)	Du, H., et al. (2024)
HZB-05	CRR1306439 CRR1306440	Southern Chainese WB	Tibetan wild boar(Hezuo pig)	Du, H., et al. (2024)
HZB-06	CRR1306441 CRR1306442	Southern Chainese WB	Tibetan wild boar(Hezuo pig)	Du, H., et al. (2024)
ERR977170	ERR977170	Northern Chinese WB	North China	Frantz, et al. (2015)
CRR1399549	CRR1399549	Western Russian WB	Arkhangelsk	Zhang, M., et al. (2025)
CRR1399550	CRR1399550	Western Russian WB	Ivanovo	Zhang, M., et al. (2025)
CRR1399551	CRR1399551	Western Russian WB	Kirov	Zhang, M., et al. (2025)
CRR1399552	CRR1399552	Western Russian WB	Leningrad	Zhang, M., et al. (2025)
CRR1399553	CRR1399553	Western Russian WB	N.Novgorod	Zhang, M., et al. (2025)
CRR1399569	CRR1399569	Eastern Russian WB 1	Amur area, Arharinsky dist	Zhang, M., et al. (2025)
CRR1399570	CRR1399570	Eastern Russian WB 1	Amur area, Arharinsky dist	Zhang, M., et al. (2025)
CRR1399571	CRR1399571	Eastern Russian WB 1	Amur area, Arharinsky dist	Zhang, M., et al. (2025)
ERR977179	ERR977179	Northern Chinese WB	North China	Frantz, et al. (2015)
CRR1399575	CRR1399575	Eastern Russian WB 1	Amur area, Arharinsky dist	Zhang, M., et al. (2025)
CRR1399579	CRR1399579	Eastern Russian WB 1	Amur area, Arharinsky dist	Zhang, M., et al. (2025)
CRR1399583	CRR1399583	Eastern Russian WB 2	Amur area, Blagoveshensk dist	Zhang, M., et al. (2025)
CRR1399585	CRR1399585	Eastern Russian WB 2	Amur area, Blagoveshensk dist	Zhang, M., et al. (2025)
CRR1399586	CRR1399586	Eastern Russian WB 2	Amur area, Blagoveshensk dist	Zhang, M., et al. (2025)
CRR1399587	CRR1399587	Eastern Russian WB 2	Amur area, Blagoveshensk dist	Zhang, M., et al. (2025)
CRR1399590	CRR1399590	Eastern Russian WB 2	Amur area, Blagoveshensk dist	Zhang, M., et al. (2025)
CRR1399596	CRR1399596	Southern Chinese WB	Henan, China	Zhang, M., et al. (2025)
CRR1399598	CRR1399598	Southern Chinese WB	Jiangxi, China	Zhang, M., et al. (2025)
CRR1399601	CRR1399601	Southern Chinese WB	Jiangxi, China	Zhang, M., et al. (2025)
