# Supplementary material
Source: Research Square preprint supplement (doi:10.21203/rs.3.rs-9264188/v1)
Supplement: Supplementary file 2 [file 3c27c2489df8fb994be2a051.xlsx]

## Sheet: Sheet1
Supplementary Table 2 Metadata of the samples used for resequencing
Sample	Subspecie	NCBI Taxonomy ID	Tissue	Island	Region	Prefecture	Latitude	Longitude	Year	Age*	Weight (kg)*	DDBJ Accession (BioProject/BioSample/Experiment/Run)
A13	Sus scrofa leucomystax	375578	tongue	Honshu	Chubu	Aichi	137.45	34.8953	2015	5 year	100	PRJDB40278/SAMD01816289/DRX886708/DRR908932
B43	Sus scrofa leucomystax	375578	ear	Honshu	Kanto	Tochigi	140.016	36.6043	2017	2 year	20	PRJDB40278/SAMD01816290/DRX886709/DRR908933
E10	Sus scrofa leucomystax	375578	tongue	Honshu	Kansai	Kyoto	134.95	35.6229	2014	3 year	32	PRJDB40278/SAMD01816291/DRX886710/DRR908934
F22	Sus scrofa leucomystax	375578	tongue	Shikoku	Shikoku	Tokushima	134.049	34.0841	2014	5 year	90	PRJDB40278/SAMD01816292/DRX886711/DRR908935
H37	Sus scrofa leucomystax	375578	tongue	Kyushu	Kyushu	Saga	130.199	33.2942	2014	2 year	40	PRJDB40278/SAMD01816293/DRX886712/DRR908936
D28	Sus scrofa riukiuanus	375579	tongue	Okinawa	Central Ryukyu	Okinawa	128.144	26.602	2014	4 year	37.5	PRJDB40278/SAMD01816294/DRX886713/DRR908937
G28	Sus scrofa riukiuanus	375579	tongue	Ishigaki	South Ryukyu	Okinawa	124.117	24.4405	2014	4 year	60	PRJDB40278/SAMD01816295/DRX886714/DRR908938
	*The data was estimated according to observations by the huters.
